# Supplementary material for: A systematic review of the effectiveness of digital interventions for illicit substance misuse harm reduction in third-level students
Source: BMC Public Health. 2019 Sep 9;19:1244. doi: 10.1186/s12889-019-7583-6 (PMC6734361; doi:10.1186/s12889-019-7583-6)
Supplement: Supplementary file 1 — Additional file 1. General search terms. (DOCX 13 kb) [file 12889_2019_7583_MOESM1_ESM.docx]

**Appendix A - General Search Terms**

| **mHealth** | **AND** | **Substance Misuse** | **AND** | **Students** |
| --- | --- | --- | --- | --- |
| mHealth | Substance *use | College student |
| Mobile health | Drug *use | University student |
| m-health | Prescription drug *use | Third-level student |
| Mobile phone intervention | Illicit drug *use | Post-secondary student |
| Mobile app | Illegal drug *use | Undergraduate |
| Mobile | Recreational drug *use | Postgraduate |
| Smart phone app | Study drug *use | Tertiary student |
| eHealth | Smart drug *use | Tertiary institute |
| Web-based intervention | Psychoactive drug *use | University |
| Internet based intervention | Problematic drug *use | Database Specific Keyword for “students” |
| Internet supported intervention | Narcotic *use |  |
| Online interventions | Cannabis *use |  |
| Health information technology intervention | Marijuana *use |  |
| Social media intervention | Database Specific Keyword for “substance use” |  |
| Digital Behaviour Change Intervention |  |  |
| Database Specific Keyword for “mHealth” |  |  |
